# Supplementary material for: 13-Ethylberberine Induces Apoptosis through the Mitochondria-Related Apoptotic Pathway in Radiotherapy-Resistant Breast Cancer Cells
Source: MDPI journal article supplement (doi:10.3390/molecules24132448), 2019-07-04
Supplement: s1 [file s1]

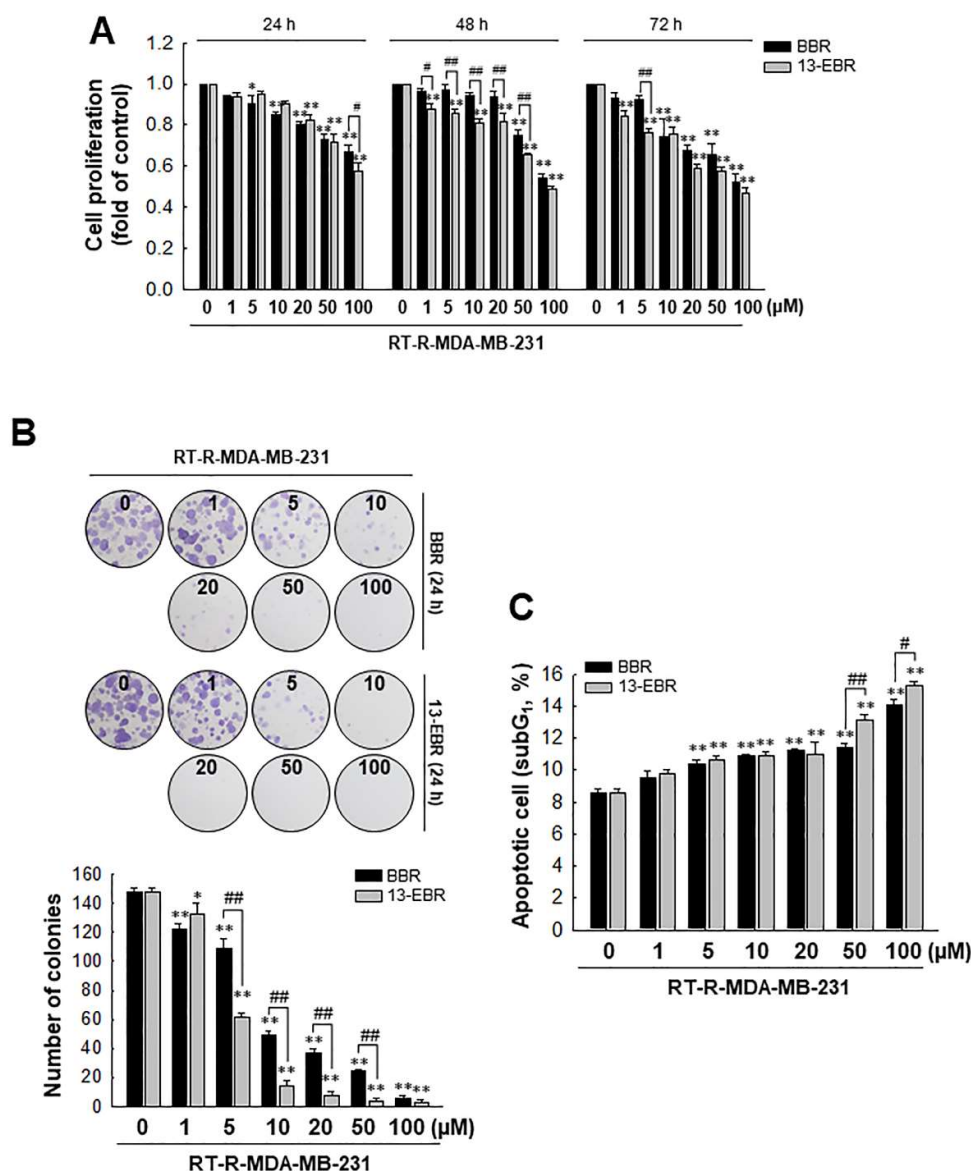

**Supplement.** Effects of BBR and 13-EBR on cell proliferation, colony formation, and apoptosis in breast cancer cells. **A.** RT-R-MDA-MB-231 cells were treated with BBR or 13-EBR at the indicated doses for 24–72 h, then cell proliferations were measured using the CCK-8 reagent. The values represent the mean  $\pm$  SEM of 3 independent experiments. \*\*  $p < 0.01$ , \*  $p < 0.05$  compared to the control of each treatment group of respective time points; ##  $p < 0.01$ , #  $p < 0.05$ . **B.** RT-R-MDA-MB-231 cells (1,000 cells/well) were seeded in 6-well plates, then stimulated with BBR or 13-EBR for 24 h at the indicated doses. Following treatment, colony formation assay was performed. The values represent the means  $\pm$  SEM of 3 independent experiments. \*\*  $p < 0.01$ , \*  $p < 0.05$  compared to the control of each treatment group; ##  $p < 0.01$ . **C.** RT-R-MDA-MB-231 cells were treated with BBR or 13-EBR at indicated doses for 24 h, and then apoptotic cells were determined by analyzing the subG<sub>1</sub> phase. The values represent the means  $\pm$  SEM of 3 independent experiments. \*\*  $p < 0.01$  compared to the control of each treatment group; ##  $p < 0.01$ , #  $p < 0.05$ .
